1 Sex and gene flow modulate evolution during range  
2 expansions in the protist *Tetrahymena thermophila*

3 Felix Moerman<sup>1,2,3,4,\*</sup>, Emanuel A. Fronhofer<sup>4</sup>,

Andreas Wagner<sup>1,3,5</sup>, Florian Altermatt<sup>1,2,\*</sup>

4 1. Department of Evolutionary Biology and Environmental Studies, University of Zürich,  
5 Winterthurerstrasse 190, Zürich CH-8057, Switzerland

6 2. Department of Aquatic Ecology, Eawag: Swiss Federal Institute of Aquatic Science and  
7 Technology, Überlandstrasse 133, Dübendorf CH-8600, Switzerland

8 3. Swiss Institute of Bioinformatics, Quartier Sorge—Bâtiment Génopode, Lausanne 1015,  
9 Switzerland

10 4. ISEM, Univ Montpellier, CNRS, RPHE, IRD, Montpellier, France

11 5. The Santa Fe Institute, Santa Fe, New Mexico 87501, USA

12 \* Corresponding authors

13 Keywords: range expansion; gene swamping; pH gradient; sex; gene flow

14

## Abstract

15

16

17

18

19

20

21

22

23

24

25

26

27

28

29

30

At species' range edges, individuals often face novel environmental conditions that may limit expansion until populations adapt. The potential to adapt depends on genetic variation upon which selection can act. However, populations at species' range edges are often genetically depauperated. One mechanism to increase genetic variation is to reshuffle existing variation through sex. During range expansions, sex can, however, act as a double-edged sword. The gene swamping hypothesis predicts that for populations expanding along an abiotic gradient, sex can hinder adaptation if asymmetric dispersal leads to numerous maladapted dispersers from the range core swamping the range edge. In this study, we experimentally tested the gene swamping hypothesis by performing replicated range expansions in landscapes with or without an abiotic pH-gradient, using the ciliate *Tetrahymena thermophila*, while simultaneously manipulating the occurrence of gene flow and sex. We show that sex accelerated evolution of the intrinsic rate of increase in absence of gene flow, but hindered it in presence of gene flow. The effect of sex, however, was independent of the pH-gradient. Conversely, sex and gene flow did not affect expansion distance, possibly due to the discrete landscape structure. Overall, our results suggest that gene swamping can affect adaptation in life-history strategies.

## 31 **Introduction**

32 Individuals living at the edge of a species' range face different conditions compared to those in  
33 the core region. For example, selection pressures differ, and often the individuals at the edge  
34 represent a small subset of a species' genetic variation [1]. The potential of a population to  
35 spread depends on its capacity to disperse, as well as on being able to grow in the local abiotic  
36 environment [2]. Consequently, when populations continue expanding, they may experience  
37 strong selection due to the range expansion itself, and are affected by concurrently changing  
38 environmental conditions.

39 During range expansions, populations can undergo rapid evolution, as demonstrated by re-  
40 cent comparative and experimental work [1], showing evolution of increased dispersal [3,4,5,6],  
41 r-selected life-history strategies [7,8], and adaptation to abiotic conditions [9,10]. Simultane-  
42 ously adapting to multiple selective pressures can be challenging, but the individuals that man-  
43 age to successfully establish and grow beyond the existing range typically reap massive benefits  
44 by escaping competition with conspecifics.

45 A major modulator for evolution is sex. Sex allows populations to reshuffle existing ge-  
46 netic variation, thus creating new variants that may be more fit [11,12,13,14]. Under conditions  
47 where populations face multiple abiotic stressors, or environments with heterogeneously dis-  
48 tributed resources, sex is a favoured strategy, facilitating adaptation in populations [15,16].  
49 This reshuffling advantage may be especially pertinent when standing genetic variation is low.  
50 This is typically the case for range edge populations, which are genetically depauperated due  
51 to repeated founder events [1,17].

52 The role of sex during range expansions is a double-edged sword, however. On the one  
53 hand, range expansion entails strong stochasticity due to repeated founder events, leading to  
54 neutral and maladaptive mutations becoming fixed and surfing along at the range edge [18,19].  
55 Sex can break the linkage between adaptive genes and such maladaptive mutations [20,19,  
56 21]. On the other hand, theory on gene swamping predicts that, during range expansion in a  
57 landscape with an abiotic gradient, sex may hinder adaptation when many dispersers move from  
58 the core population to the range edge [22,23,24,25,26]. This asymmetrical dispersal floods  
59 the range edge with individuals maladapted to the edge's abiotic conditions. If individuals

60 reproduce sexually, this can swamp the genepool at the range edge with maladapted genes.  
61 When strong enough, this swamping effect could prevent the population from adapting to the  
62 abiotic environment, and hence slow down and even stop further range expansion [23,24]. On  
63 the contrary, when drift strongly reduces adaptive variation, dispersal may positively affect  
64 adaptation by counteracting the effects of drift [25,26]. Gene swamping has been suggested as  
65 a mechanism leading to stable range borders. Despite the extensive theory on gene swamping,  
66 surprisingly little empirical and experimental work exists [27,28,29,30].

67 Here, we experimentally tested the gene swamping hypothesis using the ciliate *Tetrahymena*  
68 *thermophila*. We assessed how reproductive strategy (asexual or sexual reproduction) and gene  
69 flow (i.e., dispersal from the range core to the range edge) altered evolutionary adaptation  
70 during range expansions in landscapes with or without an abiotic pH-gradient. We found a  
71 distinct signal of gene swamping, where sex facilitated or hindered adaptation depending on  
72 the presence or absence of gene flow.

## 73 **Material and methods**

### 74 **Study organism**

75 *Tetrahymena thermophila* is a freshwater ciliate commonly used in ecological and evolutionary  
76 experiments [31,32,33,34,35]. We used four phenotypically divergent [36] clonal strains of *T.*  
77 *thermophila* obtained from the Tetrahymena Stock Center: strain B2086.2 (Research Resource  
78 Identifier TSC.SD00709), strain CU427.4 (TSC\_SD00715), strain CU428.2 (TSC\_SD00178)  
79 and strain SB3539 (TSC.SD00660).

### 80 **Experiment**

#### 81 **Microcosms**

82 We performed all experimental work (experimental evolution and bioassays) in a 20 °C climate-  
83 controlled room. Following an established method [4], we used a sliding window approach to  
84 simulate the front of experimental range expansions using two-patch landscapes, which con-

85 sisted of two 25 mL Sarstedt tubes connected by an 8 cm long silicone tube (inner diameter  
86 4 mm). We controlled dispersal between the patches by opening or closing plastic clamps on  
87 the silicone tubes. We measured dispersal as movement of cells from one patch (home patch)  
88 to the other patch (target patch). We subsequently exposed the dispersed part of the popula-  
89 tion to a new two-patch landscape, representing episodic dispersal across a discretized linear  
90 landscape.

91 We prepared 40 two-patch landscapes, and filled both patches of each landscape with 15 mL  
92 modified Neff-medium [37]. We complemented the medium (for experimental evolution and  
93 bioassays) with  $10 \mu\text{g mL}^{-1}$  Fungin and  $100 \mu\text{g mL}^{-1}$  Ampicillin to keep cultures axenic. We  
94 then inoculated one patch of each two-patch landscape with 200  $\mu\text{L}$  of ancestor culture (50  $\mu\text{L}$   
95 from each of the four ancestral strains, maintained in the same medium and temperature condi-  
96 tions as the experiment) at the start of experimental evolution.

### 97 **Treatment groups**

98 We designed a full-factorial experiment, testing the effect of 1) abiotic pH conditions, being  
99 either constant or forming a gradient ("Const": pH homogeneous at 6.5, "Grad": pH decreases  
100 by 0.5 every two to three successful dispersal events until a minimum of 4.0), 2) reproductive  
101 strategy ("Asex": pure asexual reproduction, "Sex": regular sexual reproduction) and 3) gene  
102 flow ("NoGF": no gene flow; "GF": regular gene flow to range edge).

### 103 **Experimental evolution**

104 We performed a range expansion experiment lasting ten weeks. During the experiment, we  
105 repeated the same procedure every 14 days. On every 1<sup>st</sup>, 3<sup>rd</sup>, 5<sup>th</sup>, 10<sup>th</sup> and 12<sup>th</sup> day of each  
106 procedure cycle, we initiated dispersal by opening the clamps in the two-patch landscapes for  
107 one hour. After dispersal, we prepared 40 new two-patch landscapes. If population density was  
108 measurable ( $\geq 1$  cell observed during video analysis, see below) in the target patch, we trans-  
109 ferred the content of the target patch to a new two-patch landscape. If no measurable dispersal  
110 occurred, we transferred the content of the home patch to the new two-patch landscape.

111 Every 8<sup>th</sup> day in each 14-day cycle, we simulated additional long-distance gene flow (from

112 the range core to the edge, following theoretical predictions [23,24]) in the populations with a  
113 gene flow ("GF") treatment, by removing 1.5 mL of culture, and replacing it with 1.5 mL of  
114 culture with the same density and proportions of the four ancestral clones as used at the start of  
115 the experiment.

116 To initiate sex, we transferred all populations on each 8<sup>th</sup> day of the cycle (after gene flow)  
117 to a 10 mM Triss-solution for starvation, as *T. thermophila* only mate when starved [38] (pro-  
118 tocol in Supplementary Material section S2) and incubated the starvation cultures on a shaker  
119 rotating at 120 rpm. After 36 hours, we placed the populations with a sexual reproduction  
120 ("Sex") treatment off the shaker, but kept populations with an asexual reproduction ("Asex")  
121 treatment on the shaker, as shaking prevents cells from conjugating/mating (tested during pi-  
122 lot experiments; no cell conjugation occurred when mating cultures were kept on a shaker,  
123 off the shaker almost all cells conjugated). We left cells to mate overnight, after which we  
124 transferred populations back to new two-patch landscapes. Thus, "Sex" and "Asex" treatments  
125 experienced the same nutrient availability.

## 126 **Common garden**

127 After experimental evolution, we collected 100  $\mu$ L culture from all surviving populations, and  
128 transferred the cells to 25 mL Sarstedt tubes containing 15 mL Neff-medium at pH 6.5. We  
129 maintained these populations in the common garden for 72 hours before starting bioassays, to  
130 avoid epigenetic and trans-generational effects.

## 131 **Bioassays**

132 We tested performance (population growth) of ancestral and evolved populations (after com-  
133 mon garden) under eight pH values (pH 6.5, 6.0, 5.5, 5.0, 4.5, 4.0, 3.5 and 3.0). Specifically,  
134 we prepared for every population Sarstedt tubes containing Neff-medium with adjusted pH,  
135 and inoculating it with 100  $\mu$ L of culture from the evolved/ancestral populations. We grew  
136 these populations for 12 days, sampling populations twice on the first two days, and once per  
137 day on all subsequent days. Every two days, we replaced 1 mL of culture with fresh medium  
138 to prevent population decline during bioassays.

## 139 **Sampling and video analysis**

140 We measured population density and cell characteristics (morphology and movement) using an  
141 established method [32,39]. We sampled 200  $\mu$ L of culture from every population, and diluted  
142 samples 10-100 fold in Neff-medium to ensure densities were similar, as excessive density  
143 prevents accurate video analysis. We then took 10 s videos (250 frames, 25 fps) using a Leica  
144 M165FC stereomicroscope and top-mounted Hamamatsu Orca Flash 4.0 camera. We analyzed  
145 videos using the BEMOVI R-package [39] (parameters in Supplementary Material section S4).

## 146 **Beverton-Holt model fitting**

147 To analyze local adaptation, we assessed growth rates by fitting a continuous-time version of  
148 the Beverton-Holt model [40], as this model is well-suited for microcosm data and facilitates  
149 biological interpretation of parameters [41,42]. The Beverton-Holt model is given by the equa-  
150 tion:

$$\frac{dN}{dt} = \left( \frac{r_0 + d}{1 + \alpha N} - d \right) N \quad (1)$$

151 where the intraspecific competitive ability ( $\alpha$ ) is equal to:

$$\alpha = \frac{r_0}{\widehat{N}d} \quad (2)$$

152 where  $r_0$  is the intrinsic rate of increase,  $N$  the population size,  $\alpha$  the intraspecific competitive  
153 ability,  $\widehat{N}$  the equilibrium population density and  $d$  the death rate of the population. We es-  
154 timated the parameters using a Bayesian approach adapted from Rosenbaum et al. [43]. For  
155 model code see <https://zenodo.org/record/2658131>

## 156 **Statistical analysis**

157 All statistical analyses were performed with the R language for statistical computing, version  
158 3.5.1.

159 We assessed how survival during range expansion was affected by reproductive strategy,  
160 abiotic pH-gradient and gene flow using Bayesian generalized linear models (binomial distri-

161 bution) with the ‘Rethinking’-package (version 1.59). We created all possible models, and then  
162 used the Watanabe-Akaike information criterion [44] comparison to calculate relative impor-  
163 tance of the independent factors and weighted model predictions.

164 We tested for local adaptation by assessing changes in the intrinsic rate of increase  $r_0$  of  
165 the evolved populations under the pH conditions they experienced during evolution, compared  
166 to the ancestor under the same pH conditions. This was done by dividing the  $r_0$  estimates  
167 of evolved populations by the mean  $r_0$  of the mixed ancestral populations (populations with  
168 the initial ancestral genotype mixture), and by subsequently calculating the logarithm (base  
169 2, for ease of interpretation) of this ratio (log-ratio response). We then fit a full interaction  
170 model (‘stats’-package) containing abiotic pH-gradient, reproductive strategy and gene flow as  
171 factors, and used the dredge function (‘MuMin’-package, version 1.43.6) to select the model  
172 with lowest AICc (Akaike Information Criterion, corrected for small sample size [45]) score.  
173 We calculated relative importance (RI) of independent factors as the sum of the model weights  
174 of models that included this factor, and reported statistical output of the best-fitting model.



## 175 Results

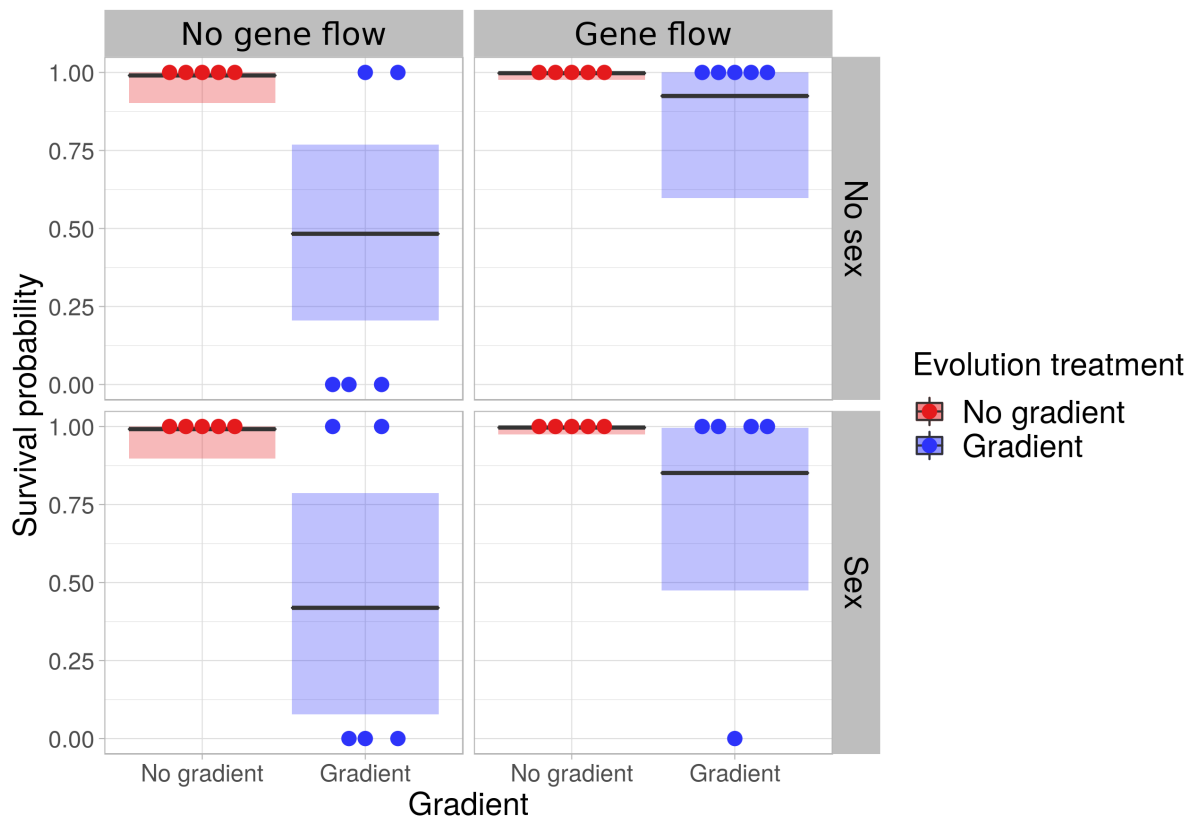

Figure 1: Survival of populations at the end of the range expansion experiment. Dots represent individual datapoints of populations that either survived (1) or went extinct (0). The boxes show the weighted predictions of survival based on the WAIC weighting on all Bayesian survival models, with the line representing the mean, and the range of the boxes the 95 % probability interval. Blue dots and boxes represent the populations expanding in a landscape without a pH gradient ("Const") and red dots and boxes the ppulations expanding in a pH gradient ("Grad").

176 Of the 40 range expansions, 33 were successful, whereas the other seven went extinct (Fig. 1).  
177 Extinctions only happened during range expansions into a gradient, but were largely counter-  
178 acted by gene flow (Fig. 1; see also section S6.6 in Supplementary Material). Local adaptation  
179 (Table 1) depended on abiotic pH-gradient (RI=0.998), reproductive strategy (RI=0.880), gene  
180 flow (RI=0.898) and the interaction between reproductive strategy and gene flow (RI=0.815).  
181 Although model selection showed no absolute preference for a single model, all considered  
182 models ( $\delta AIC_c < 2.0$ ) contained these factors (model comparison table in section S6.1 of Sup-  
183plementary Material). The best model (Tab. 2; Fig. 2) showed that populations expanding  
184 into a gradient ("Const") evolved only marginally increased local adaptedness, whereas popu-  
185 lations that expanded into a gradient ("Grad") greatly increased local adaptation ( $F_{1,29}=128.67$ ,

186  $p < 0.0001$ ). Although the factors reproductive strategy ( $F_{1,29}=0.48, p=0.49$ ) and gene flow  
187 ( $F_{1,29}=2.77, p=0.11$ ) individually only marginally increased local adaptation, their interaction  
188 was significant and strongly decreased local adaptation ( $F_{1,29}=10.67, p=0.0028$ , Fig. 2, Tab. 2),  
189 with populations evolving higher intrinsic rates of increase either when there was sex without  
190 gene flow ("Sex", "NoGF"), or gene flow without sex ("Asex", "GF").

| <b>Independent factor</b>                               | <b>RI</b> |
|---------------------------------------------------------|-----------|
| Abiotic pH-gradient                                     | 0.998     |
| Gene flow                                               | 0.898     |
| Reproductive strategy                                   | 0.880     |
| Reproductive strategy * Gene flow                       | 0.815     |
| Abiotic pH-gradient * Gene flow                         | 0.387     |
| Reproductive strategy * Abiotic pH-gradient             | 0.284     |
| Abiotic pH-gradient * Reproductive strategy * Gene flow | 0.021     |

Table 1: Relative importance (RI) of the different independent variables obtained with AICc comparison of all possible models testing local adaptation as the evolution of intrinsic rate of increase  $r_0$ .

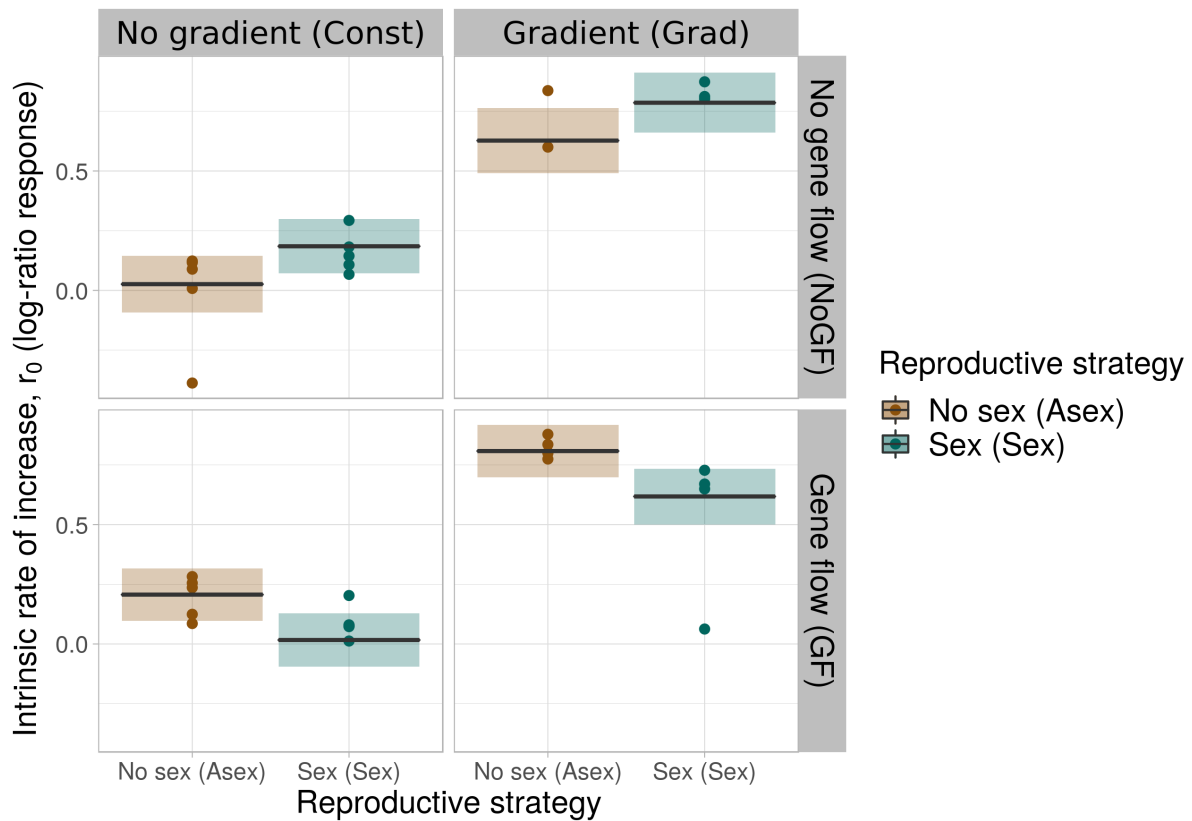

Figure 2: Local adaptation, tested as the evolution of intrinsic rate of increase  $r_0$  under the pH-conditions experienced during range expansion. The y-axis shows the change in  $r_0$  compared to the ancestor (log-ratio response). Dots represent individual data points, boxplots show the model predictions of the best model (mean and 95 %-confidence interval). Purple boxes and dots represent populations reproducing asexually ("Asex"), orange boxes and dots sexually reproducing populations ("Sex").

|                                 | Degrees of freedom | F-value | Pr (>F) |
|---------------------------------|--------------------|---------|---------|
| Reproductive strategy           | 1                  | 0.482   | 0.493   |
| Gene flow                       | 1                  | 2.768   | 0.107   |
| Abiotic pH gradient             | 1                  | 128.7   | <0.0001 |
| Reproductive strategy*Gene flow | 1                  | 10.67   | 0.003   |
| Residuals                       | 29                 |         |         |

Table 2: ANOVA table of the best model for evolution of intrinsic rate of increase  $r_0$  according to AICc model comparison.

## 191 Discussion

192 We experimentally assessed the gene swamping hypothesis by performing replicated range  
193 expansions using the protist *T. thermophila*, where we experimentally manipulated abiotic pH  
194 conditions (constant versus gradient), reproductive strategy (asexual versus sexual) and gene  
195 flow (no gene flow versus gene flow). We demonstrated how sex interacts with gene flow,  
196 affecting local adaptation of organisms at the range edge (Fig. 2; Tab. 1; Tab. 2). We found  
197 that sex facilitated adaptation in the absence of gene flow, but inhibited it in presence of gene  
198 flow. However, this interaction between sex and gene flow was independent of the pH-gradient.

199 Populations undergoing range expansions face multiple selective pressures [1], and hence  
200 face a strong pressure to adapt. Theoretical predictions suggest sex can be advantageous or dis-  
201 advantageous during range expansion, depending on the context. The theory on gene swamp-  
202 ing predicts that during range expansions sex can hinder adaptation when populations undergo  
203 strong asymmetrical dispersal from the range core to the range edge [22,23,24]. We showed  
204 in this experiment that sex and gene flow interact during range expansions, modulating local  
205 adaptation. Despite having only four mating events, we found that sex facilitated adaptation in  
206 absence of gene flow, but hindered it when gene flow swamps the population at the expansion  
207 front with maladapted individuals. Surprisingly, while the gene swamping hypothesis predicts  
208 this pattern exclusively in the presence of abiotic gradients [22,23,24], we observed similar  
209 effects of gene swamping in presence and in absence of an abiotic pH-gradient. We argue that  
210 gene swamping in absence of an abiotic gradient could stem from evolution of life-history strat-  
211 egy during range expansions. Populations at the range edge undergo selection for fast repro-  
212 duction [46], and thus range expansions also represent a biotic gradient in competition. Hence,  
213 gene swamping may imply that individuals maladapted in life-history strategy interbreed with  
214 the population at the range edge, and consequently gene swamping affects adaptation during  
215 range expansions without an abiotic gradient, leading to analogous changes in adaptation as in  
216 the case of range expansions into an abiotic gradients.

217 Although we show that gene swamping affects adaptation during range expansions, we  
218 could not detect any effects of gene swamping on range expansion rates as described in the  
219 theoretical framework, even though population growth rate is a driving force behind expansion

220 rate of populations [2,47]. This could stem from the experimental setup, where we used dis-  
221 crete landscapes connected through episodic dispersal events. This setup may be insufficiently  
222 sensitive to detect signals in expansion rate. Alternatively, this setup may lead to pushed waves  
223 rather than pulled waves (see Pachevsky and Levine [48]) which changes predictions. Further-  
224 more, in model systems, where sexual reproduction is more frequent than in our experiment,  
225 the signature of gene swamping may be stronger, potentially leading to changes in expansion  
226 rate. Further experimental efforts may prove useful to show 1) how common gene swamping is  
227 with regards to abiotic gradients and model species, 2) quantifying the effect of gene swamping  
228 on expansion rate in more sensitive experimental setups and 3) exploring the strength of gene  
229 swamping in terms of frequency of sexual reproduction.

## 230 **Acknowledgements**

231 We thank Samuel Hürlemann, Silvana Käser and Sarah Bratschi for help with laboratory work.  
232 Funding is from the University of Zurich URPP Evolution in Action and the Swiss National  
233 Science Foundation, Grant No PP00P3\_179089. This is publication ISEM-YYYY-XXX of the  
234 Institut des Sciences de l'Evolution – Montpellier. We would also like to acknowledge support  
235 by Swiss National Science Foundation grant 31003A\_172887 and European Research Council  
236 Advanced Grant No. 739874.

## 237 **Author contributions**

238 FM, EAF, AW and FA designed the experiment. FM performed experimental work and statis-  
239 tical analyses. FM, FA, AW and EAF interpreted the results. FM and FA wrote the first version  
240 of the manuscript and all authors commented on the final version.

## 241 **References**

- 242 [1] A. Chuang and C. R. Peterson, *Glob. Change. Biol.*, 2016, **22**, 494–512.
- 243 [2] J. G. Skellam, *Biometrika*, 1951, **38**, 196–218.
- 244 [3] A. D. Simmons and C. D. Thomas, *Am. Nat.*, 2004, **164**, 378–395.
- 245 [4] E. A. Fronhofer and F. Altermatt, *Nat. Commun.*, 2015, **6**, 6844.
- 246 [5] B. M. Ochocki and T. E. X. Miller, *Nat. Commun.*, 2017, **8**, 14315.
- 247 [6] C. Weiss-Lehman, R. A. Hufbauer and B. A. Melbourne, *Nat. Commun.*, 2017, **8**, 14303.
- 248 [7] L. Therry, V. Nilsson-Örtman, D. Bonte and R. Stoks, *J. Evol. Biol.*, 2014, **27**, 141–152.
- 249 [8] B. L. Phillips, G. P. Brown and R. Shine, *Ecology*, 2010, **91**, 1617–1627.
- 250 [9] K. H. P. Van Petegem, J. Boeye, R. Stoks and D. Bonte, *Am. Nat.*, 2016, **188**, 485–498.

- 251 [10] M. Szűcs, M. L. Vahsen, B. A. Melbourne, C. Hoover, C. Weiss-Lehman and R. A. Huf-  
252 bauer, *Proc. Natl. Acad. Sci. U.S.A.*, 2017, 201712934.
- 253 [11] S. P. Otto and T. Lenormand, *Nat. Rev. Genet.*, 2002, **3**, 252–261.
- 254 [12] R. T. Smith and J. M. Smith, *The Evolution of Sex*, CUP Archive, 1978.
- 255 [13] A. S. Kondrashov, *J. Hered.*, 1993, **84**, 372–387.
- 256 [14] G. Bell, *The Masterpiece of Nature :: The Evolution and Genetics of Sexuality*, CUP  
257 Archive, 1982.
- 258 [15] L. Becks and A. F. Agrawal, *Nature*, 2010, **468**, 89–92.
- 259 [16] P. Luijckx, E. K. H. Ho, M. Gasim, S. Chen, A. Stanic, C. Yanchus, Y. S. Kim and A. F.  
260 Agrawal, *Proc. Natl. Acad. Sci. U.S.A.*, 2017, **114**, 534–539.
- 261 [17] O. Hallatschek, P. Hersen, S. Ramanathan and D. R. Nelson, *Proc. Natl. Acad. Sci. U.S.A.*,  
262 2007, **104**, 19926–19930.
- 263 [18] S. Klopstein, M. Currat and L. Excoffier, *Mol. Biol. Evol.*, 2006, **23**, 482–490.
- 264 [19] L. Excoffier, M. Foll and R. J. Petit, *Annu. Rev. Ecol. Evol. Syst.*, 2009, **40**, 481–501.
- 265 [20] S. Peischl, M. Kirkpatrick and L. Excoffier, *Am. Nat.*, 2015, **185**, E81–E93.
- 266 [21] S. R. Keller and D. R. Taylor, *J. Evol. Biol.*, 2010, **23**, 1720–1731.
- 267 [22] J. B. S. Haldane and E. B. Ford, *Proceedings of the Royal Society of London. Series B -*  
268 *Biological Sciences*, 1956, **145**, 306–308.
- 269 [23] G. García-Ramos and M. Kirkpatrick, *Evolution*, 1997, **51**, 21–28.
- 270 [24] M. Kirkpatrick and N. H. Barton, *Am. Nat.*, 1997, **150**, 1–23.
- 271 [25] J. Polechová and N. H. Barton, *PNAS*, 2015, **112**, 6401–6406.
- 272 [26] J. Polechová, *PLOS Biol.*, 2018, **16**, e2005372.
- 273 [27] K. J. Gaston, *Proc. R. Soc. B-Biol. Sci.*, 2009, **276**, 1395–1406.

- 274 [28] J. P. Sexton, P. J. McIntyre, A. L. Angert and K. J. Rice, *Annu. Rev. Ecol. Evol. Syst.*,  
275 2009, **40**, 415–436.
- 276 [29] T. Lenormand, *Trends Ecol. Evol.*, 2002, **17**, 183–189.
- 277 [30] J. R. Bridle and T. H. Vines, *Trends Ecol. Evol.*, 2007, **22**, 140–147.
- 278 [31] K. Collins, *Tetrahymena Thermophila*, Academic Press, 2012.
- 279 [32] F. Altermatt, E. A. Fronhofer, A. Garnier, A. Giometto, F. Hammes, J. Klecka,  
280 D. Legrand, E. Mächler, T. M. Massie, F. Pennekamp, M. Plebani, M. Pontarp,  
281 N. Schtickzelle, V. Thuillier and O. L. Petchey, *Methods Ecol. Evol.*, 2015, **6**, 218–231.
- 282 [33] S. Jacob, E. Bestion, D. Legrand, J. Clobert and J. Cote, *Evol. Ecol.*, 2015, **29**, 851–871.
- 283 [34] E. A. Fronhofer, S. Gut and F. Altermatt, *J. Evol. Biol.*, 2017, **30**, 2165–2176.
- 284 [35] Scheuerl Thomas, Cairns Johannes, Becks Lutz and Hiltunen Teppo, *Proc. R. Soc. B-Biol.*  
285 *Sci.*, 2019, **286**, 20190245.
- 286 [36] F. Moerman, A. Arquint, S. Merkli, A. Wagner, F. Altermatt and E. A. Fronhofer, *bioRxiv*,  
287 2019, 758300.
- 288 [37] D. M. Cassidy-Hanley, *Methods in Cell Biology*, Elsevier, 2012, vol. 109, pp. 237–276.
- 289 [38] D. H. Lynn and F. P. Doerder, *Methods Cell Biol.*, 2012, **109**, 9–27.
- 290 [39] F. Pennekamp, N. Schtickzelle and O. L. Petchey, *Ecol. Evol.*, 2015, **5**, 2584–2595.
- 291 [40] R. Beverton and S. Holt, *On the Dynamics of Exploited Fish Populations*, Springer, 1993.
- 292 [41] E. A. Fronhofer, L. Govaert, M. I. O’Connor, S. J. Schreiber and F. Altermatt, *bioRxiv*,  
293 2018, 485946.
- 294 [42] H. R. Thieme, *Mathematics in Population Biology*, Princeton University Press, 2003.
- 295 [43] B. Rosenbaum, M. Raatz, G. Weithoff, G. F. Fussmann and U. Gaedke, *Front. Ecol. Evol.*,  
296 2019, **6**, 234.



- 297 [44] A. Gelman, J. Hwang and A. Vehtari, *Stat. Comput.*, 2014, **24**, 997–1016.
- 298 [45] C. M. Hurvich and C.-L. Tsai, *Biometrika*, 1989, **76**, 297–307.
- 299 [46] O. J. Burton, B. L. Phillips and J. M. J. Travis, *Ecol. Lett.*, 2010, **13**, 1210–1220.
- 300 [47] A. Giometto, A. Rinaldo, F. Carrara and F. Altermatt, *Proc. Natl. Acad. Sci. U.S.A.*, 2014,  
301 **111**, 297–301.
- 302 [48] E. Pachepsky and J. Levine, *Am. Nat.*, 2011, **177**, 18–28.
